# Supplementary material for: 60-Hour Sleep Deprivation Affects Submaximal but Not Maximal Physical Performance
Source: PubMed Central journal article supplement (PMC6198717; doi:10.3389/fphys.2018.01437), 2018-10-16
Supplement: Table_1.pdf [file Table_1.pdf]

Supplementary table 1. Performance test results (mean±sd) (95%CI) during the bicycle ergometer test by each test bout. (All subjects were able to cycle at least 7 minutes, but only 4 subjects completed 10 minutes of cycling).

|                                                                         | 1 min                   | 2 min                      | 3 min                      | 4 min                      | 5 min                      | 6 min                     | 7 min                     | 8 min                     | 9 min                   | 10 min                   | Maximal result           |
|-------------------------------------------------------------------------|-------------------------|----------------------------|----------------------------|----------------------------|----------------------------|---------------------------|---------------------------|---------------------------|-------------------------|--------------------------|--------------------------|
|                                                                         | (n=10)                  | (n=10)                     | (n=10)                     | (n=10)                     | (n=10)                     | (n=10)                    | (n=10)                    | (n=9)                     | (n=8)                   | (n=4)                    |                          |
| <b>HR: Pre</b><br>(b/min)                                               | 125±14<br>(116-135)     | 134±15<br>(123-144)        | 142±17<br>(130-154)        | 150±17<br>(138-162)        | 158±16<br>(146-170)        | 167±15<br>(157-177)       | 174±13<br>(165-183)       | 174±12<br>(164-183)       | 183±10<br>(173-191)     | 185±10<br>(170-200)      | 190±7<br>(185-195)       |
| <b>HR: Post</b><br>(b/min)                                              | 111±9<br>(104-118) **   | 122±11<br>(114-129) **     | 131±13<br>(122-140) **     | 138±13<br>(129-147) **     | 148±15<br>(138-159) **     | 156±13<br>(146±166) **    | 161±13<br>(151-170) *     | 169±12<br>(160-178)       | 173±10<br>(163-182)     | 178±10<br>(168-189)      | 187±6<br>(182-191)       |
| <b>HR: Pre-Post</b><br>difference<br>(b/min)                            | -14±11<br>(-22 - -6)    | -11±8<br>(-11 - -17)       | -11±8<br>(-17 - -6)        | -12±8<br>(-17 - -6)        | -10±10<br>(-17 - -3)       | -11±10<br>(-18 - 4)       | -13±13<br>(-22 - -4)      | -5±12<br>(-14 - 4)        | -10±11<br>(-19 - 1)     | -10±18<br>(-55 - 35)     | -3.1±5.3<br>(-6.9 - 0.7) |
| <b>VO<sub>2</sub>: Pre</b><br>ml·kg <sup>-1</sup> ·min <sup>-1</sup> )  | 12.4±3.1<br>(10.2-14.6) | 20.8±4.2<br>(17.8-23.9)    | 24.8±4.5<br>(23.5-30.1)    | 26.8±4.6<br>(23.5-30.1)    | 29.3±4.8<br>(25.9-32.8)    | 31.4±5.1<br>(27.7-35.0)   | 33.8±5.6<br>(29.7-37.8)   | 35.9±6.2<br>(31.1-40.6)   | 36.9±6.9<br>(31.2-42.7) | 37.8±9.1<br>(23.4-52.26) | 38.6±8.1<br>(32.8-44.3)  |
| <b>VO<sub>2</sub>: Post</b><br>ml·kg <sup>-1</sup> ·min <sup>-1</sup> ) | 11.4±2.9<br>(9.3-13.5)  | 18.3±3.2<br>(16.0-20.6) ** | 21.2±3.5<br>(18.7-23.7) ** | 24.0±3.7<br>(21.3-26.7) ** | 26.5±3.9<br>(23.7-29.3) ** | 29.0±4.5<br>(25.8-32.2) * | 31.1±4.7<br>(27.8-34.4) * | 33.4±5.5<br>(29.2-37.6) * | 34.7±5.5<br>(30.0-39.3) | 36.6±5.9<br>(27.1-46.0)  | 38.5±6.4<br>(33.9-43.1)  |

## Sleep deprivation and physical performance

|                                                                                           |                           |                           |                            |                            |                            |                            |                              |                             |                             |                              |                             |
|-------------------------------------------------------------------------------------------|---------------------------|---------------------------|----------------------------|----------------------------|----------------------------|----------------------------|------------------------------|-----------------------------|-----------------------------|------------------------------|-----------------------------|
| <b>VO<sub>2</sub>: Pre-Post</b><br>difference<br>ml·kg <sup>-1</sup> ·min <sup>-1</sup> ) | -1.0±2.7<br>(-2.9 - 0.9)  | -2.5±2.4<br>(-4.2 - -0.8) | -3.6±2.3<br>(-5.3 - -1.9)  | -2.8±2.2<br>(-4.3 - -1.3)  | -2.8±2.5<br>(-4.6 - -1.0)  | -2.4±2.9<br>(-4.4 - -0.3)  | -2.7±2.7<br>(-4.7 - -0.7)    | -2.5±2.9<br>(-4.7 - -0.3)   | -2.2±3.3<br>(-5.0 - 0.5)    | -1.3±5.1<br>(-9.4 - 6.8)     | -0.1±3.1<br>(-2.3 - 2.2)    |
| <b>VE: Pre</b><br>(L/min)                                                                 | 27.2±3.4<br>(24.7-29.6)   | 37.6±4.6<br>(34.3-40.9)   | 49.0±6.1<br>(44.6-53.4)    | 56.3±7.9<br>(50.6-61.9)    | 64.7±8.0<br>(59.0-70.4)    | 76.0±10.0<br>(68.9-83.2)   | 88.6±13.3<br>(79.0-98.1)     | 108.7±21.0<br>(92.5-124.9)  | 132.8±30.9<br>(107.0-158.6) | 132.4±24.9<br>(92.9-172.0)   | 149.6±33.5<br>(125.7-173.5) |
| <b>VE:</b><br>Post(L/min)                                                                 | 23.2±2.4<br>(21.5-24.9) * | 33.2±3.1<br>(31.0-35.3) * | 41.2±3.9<br>(38.4-43.9) ** | 49.0±5.6<br>(44.9-53.0)    | 57.1±8.0<br>(51.3-62.8) *  | 68.2±9.8<br>(61.2-75.2) *  | 76.9±13.8<br>(67.0-86.8) *   | 94.0±19.5<br>(78.9-109.0) * | 114.2±26.4<br>(92.2-136.2)  | 119.2±19.1<br>(88.7-149.6)   | 153.1±30.2<br>(131.5-174.6) |
| <b>VE: Pre-Post</b><br>difference<br>(L/min)                                              | -4.0±4.0<br>(-6.9 - -1.1) | -4.5±5.6<br>(-8.5 - -0.5) | -7.9±7.3<br>(-13.1 - -2.6) | -7.3±8.6<br>(-13.5 - -1.1) | -7.6±9.7<br>(-14.5 - -0.7) | -7.8±9.7<br>(-14.7 - -0.9) | -11.7±13.5<br>(-21.3 - -2.0) | -14.7±20.1<br>(-30.2 - 0.7) | -18.6±23.0<br>(-37.9 - 0.6) | -13.3±32.1<br>(-64.3 - 37.8) | 3.5±11.8<br>(-5.0 - 11.9)   |
| <b>RER: Pre</b>                                                                           | 1.05±0.13<br>(0.96-1.15)  | 0.99±0.07<br>(0.94-1.04)  | 0.87±0.08<br>(0.81-0.93)   | 0.96±0.11<br>(0.88-1.04)   | 1.05±0.11<br>(0.97-1.13)   | 1.11±0.13<br>(1.02-1.20)   | 1.18±0.15<br>(1.07-1.29)     | 1.23±0.15<br>(1.11-1.34)    | 1.32±0.21<br>(1.17-1.47)    | 1.36±0.23<br>(1.19-1.52)     | 1.42±0.30<br>(1.20-1.62)    |
| <b>RER: Post</b>                                                                          | 0.99±0.12<br>(0.90-1.08)  | 0.92±0.10<br>(0.85-0.99)  | 0.84±0.07<br>(0.79-0.89)   | 0.92±0.11<br>(0.84-1.00)   | 0.99±0.10<br>(0.92-1.07)   | 1.05±0.09<br>(0.98-1.11)   | 1.12±0.10<br>(1.05-1.19)     | 1.15±0.10<br>(1.07-1.21)    | 1.23±0.13<br>(1.13-1.32)    | 1.26±0.13<br>(1.17-1.35)     | 1.30±0.12<br>(1.21-1.38)    |

## Sleep deprivation and physical performance

|                                               |                |                          |                |                          |                |                          |                |                           |                |                            |                           |
|-----------------------------------------------|----------------|--------------------------|----------------|--------------------------|----------------|--------------------------|----------------|---------------------------|----------------|----------------------------|---------------------------|
| <b>RER:</b> Pre-                              | -0.06±0.17     | -0.07±0.13               | -0.03±0.12     | -0.04±0.18               | -0.05±0.14     | -0.06±0.13               | -0.06±0.15     | -0.08±0.13                | -0.09±0.16     | -0.10±0.16                 | -0.12±0.20                |
| Post<br>difference                            | (-0.18 - 0.06) | (-0.16 - 0.03)           | (-0.12 - 0.05) | (-0.17 - 0.09)           | (-0.16 - 0.05) | (-0.15 - 0.03)           | (-0.17 - 0.04) | (-0.17 - 0.01)            | (-0.20 - 0.02) | (-0.21 - 0.02)             | (-0.26 - 0.02)            |
| <b>LA:</b> Pre<br>(mmol/L)                    | -              | 2.8±2.0<br>(1.4-4.2)     | -              | 3.3±1.4<br>(2.3-4.2)     | -              | 5.5±2.2<br>(3.9-7.1)     | -              | 9.4±3.2<br>(6.9-11.9)     | -              | 10.0±3.1<br>(5.1-14.9)     | 10.7±2.3<br>(9.0-12.5)    |
| <b>LA:</b> Post<br>(mmol/L)                   | -              | 1.9±0.7<br>(1.4-2.4)     | -              | 2.6±0.6<br>(2.1-3.0)     | -              | 4.2±1.0<br>(3.5-5.0)     | -              | 6.5±1.6<br>(5.3-7.7) *    | -              | 9.0±4.0<br>(2.6-15.4)      | 8.2±2.6<br>(6.2-10.2) *   |
| <b>LA:</b> Pre-Post<br>difference<br>(mmol/L) |                | -0.9±1.9<br>(-2.3 - 0.4) | -              | -0.7±1.1<br>(-1.5 - 0.3) | -              | -1.3±1.9<br>(-2.6 - 0.1) | -              | -2.9±2.5<br>(-4.8 - -1.0) | -              | -2.0±1.4<br>(-14.7 - 10.7) | -2.5±2.6<br>(-4.5 - -0.6) |

HR=heart rate, VO<sub>2</sub>=oxygen uptake, VE=ventilation, LA=lactate \* p<0.05 significant difference compared to PRE-value, \*\* p<0.005

significant difference compared to PRE-value
