# Supplementary material for: 60-Hour Sleep Deprivation Affects Submaximal but Not Maximal Physical Performance
Source: PubMed Central journal article supplement (PMC6198717; doi:10.3389/fphys.2018.01437), 2018-10-16
Supplement: Table_2.pdf [file Table_2.pdf]

Supplementary table 2. The detailed statistics (degree of freedom, mean square, F-value, significance and partial eta square) in aerobic performance test before and after the SD.

---

| <b>Variable</b>                                                 | <b>df</b> | <b>Mean Square</b> | <b>F</b> | <b>Significance</b> | <b>Partial eta squared</b> |
|-----------------------------------------------------------------|-----------|--------------------|----------|---------------------|----------------------------|
| <b>HR</b> (b/min)                                               | 1.0       | 4929.3             | 18.1     | 0.002               | 0.669                      |
| <b>VO<sub>2</sub></b> (ml·kg <sup>-1</sup> ·min <sup>-1</sup> ) | 1.0       | 225.9              | 14.7     | 0.004               | 0.621                      |
| <b>VE</b> (L/min)                                               | 1.0       | 1835.7             | 8.6      | 0.016               | 0.49                       |
| <b>RER</b>                                                      | 1.0       | 0.104              | 1.8      | 0.213               | 0.166                      |
| <b>LA</b> (mmol/L)                                              | 1.0       | 44.2               | 8.0      | 0.022               | 0.501                      |

---
