# Supplementary material for: 60-Hour Sleep Deprivation Affects Submaximal but Not Maximal Physical Performance
Source: PubMed Central journal article supplement (PMC6198717; doi:10.3389/fphys.2018.01437), 2018-10-16
Supplement: Table_3.pdf [file Table_3.pdf]

Supplementary table 3. The detailed statistics (degree of freedom, mean square, F-value, significance and partial eta square) in motor control and reaction times.

| Variable                                                                      | df    | Mean Square | F    | Significance | Partial eta squared |
|-------------------------------------------------------------------------------|-------|-------------|------|--------------|---------------------|
| Error of the displacement in 60 ° range of motion after elbow flexion (deg)   | 5     | 3.416       | 1.3  | 0.246        | 0.067               |
| Error of the displacement in 60 ° range of motion after elbow extension (deg) | 5     | 0.457       | 0.7  | 0.587        | 0.038               |
| Error of the displacement in 20 ° range of motion after elbow flexion (deg)   | 5     | 11.532      | 3.3  | 0.008        | 0.150               |
| Error of the displacement in 20 ° range of motion after elbow extension (deg) | 3.164 | 5.711       | 4.4  | 0.06         | 0.188               |
| Angular velocity in 60 ° range of motion (deg·s <sup>-1</sup> )               | 3.074 | 37470.335   | 16.1 | <0.001       | 0.459               |
| Angular velocity in 20 ° range of motion (deg·s <sup>-1</sup> ).              | 5     | 2355.273    | 1.9  | 0.094        | 0.093               |
| Reaction time test for light stimulus (ms)                                    | 2.988 | 2179.7      | 10.1 | <0.001       | 0.346               |
| Reaction time test for sound stimulus (ms)                                    | 3.290 | 1819.0      | 10.8 | <0.001       | 0.363               |
