# Supplementary material for: 60-Hour Sleep Deprivation Affects Submaximal but Not Maximal Physical Performance
Source: PubMed Central journal article supplement (PMC6198717; doi:10.3389/fphys.2018.01437), 2018-10-16
Supplement: Table_4.pdf [file Table_4.pdf]

Supplementary table 4. The detailed statistics (degree of freedom, mean square, F-value, significance and partial eta square) in balance test during the SD (EO=eyes open, EC=eyes closed).

| <b>Variable</b>                              | <b>df</b> | <b>Mean Square</b> | <b>F</b> | <b>Significance</b> | <b>Partial eta squared</b> |
|----------------------------------------------|-----------|--------------------|----------|---------------------|----------------------------|
| <b>EO:</b> Medio-lateral distance (mm)       | 2.60      | 3116.8             | 5.3      | 0.004               | 0.220                      |
| <b>EO:</b> Antero-posterior distance (mm)    | 5         | 246.6              | 0.5      | 0.698               | 0.028                      |
| <b>EO:</b> Moment of velocity (mm/s)         | 2.473     | 18.8               | 1.3      | 0.278               | 0.065                      |
| <b>EC:</b> Medio-lateral distance (mm)       | 5         | 1070.0             | 3.0      | 0.014               | 0.137                      |
| <b>EC:</b> Antero-posterior distance (mm)    | 5         | 4167.5             | 2.9      | 0.019               | 0.131                      |
| <b>EC:</b> Moment of velocity (mm/s)         | 3.184     | 54.2               | 2.8      | 0.045               | 0.128                      |
| <b>Tandem/ EO:</b> Medio-lateral distance    | 2.89      | 10274.1            | 2.5      | 0.067               | 0.118                      |
| <b>Tandem/ EO:</b> Antero-posterior          | 5         | 2875.5             | 0.8      | 0.542               | 0.041                      |
| <b>Tandem/ EO:</b> Moment of velocity (mm/s) | 5         | 851.3              | 1.6      | 0.169               | 0.077                      |
| <b>Tandem/ EC:</b> Medio-lateral distance    | 5         | 27884.8            | 1.6      | 0.170               | 0.077                      |

## Sleep deprivation and physical performance

---

|                                              |       |          |     |       |       |
|----------------------------------------------|-------|----------|-----|-------|-------|
| <b>Tandem/ EC: Antero-posterior</b>          | 3.293 | 24871.7  | 0.8 | 0.485 | 0.042 |
| <b>Tandem/ EC: Moment of velocity (mm/s)</b> | 1.273 | 159692.3 | 1.0 | 0.394 | 0.052 |

---
